# Supplementary material for: One-pot synthesis of hollow hydrangea Au nanoparticles as a dual catalyst with SERS activity for in situ monitoring of a reduction reaction
Source: Royal Society of Chemistry journal article supplement (doi:10.1039/c9ra00733d), 2019-01-01
Supplement: c9ra00733d1.pdf [file c9ra00733d1.pdf]

Electronic Supplementary Material (ESI)

### One pot synthesis of hollow hydrangea Au nanoparticle as a dual catalyst with SERS activity for in-suit monitoring reduction reaction

Yazhou Qin,<sup>a</sup> Yuxiang Lu,<sup>a,b</sup> Wufan Pan,<sup>a,b</sup> Dongdong Yu,<sup>c</sup> and Jianguang Zhou <sup>\* a b</sup>

- a State Key Laboratory of Industrial Control Technology, College of Control Science and Engineering, Zhejiang University, 38 Zheda Road, Hangzhou 310027, P. R. China.  
E-mail: jgzhou@zju.edu.cn.
- b Department of Chemistry, Zhejiang University, Hangzhou, 310027, China.
- c Hospital of Zhejiang University, Zhejiang University, Hangzhou, 310027, China.

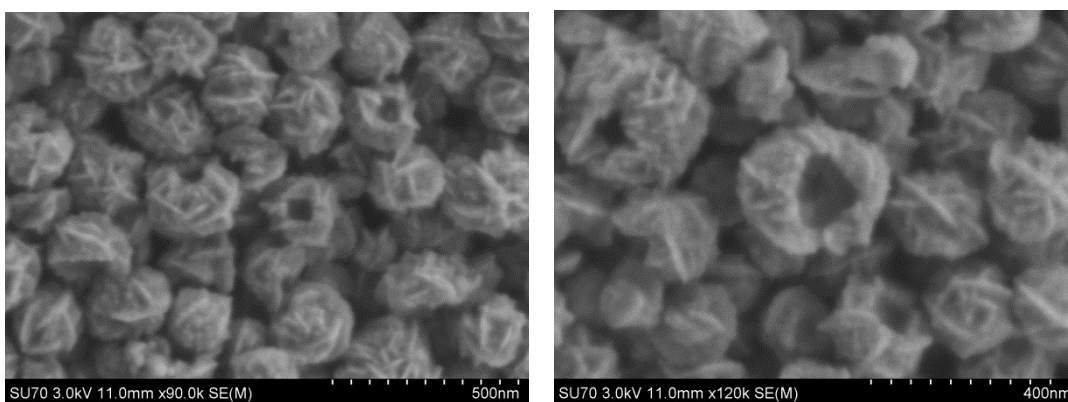

Fig. S1 SEM image of hollow flower-like Au crystals.

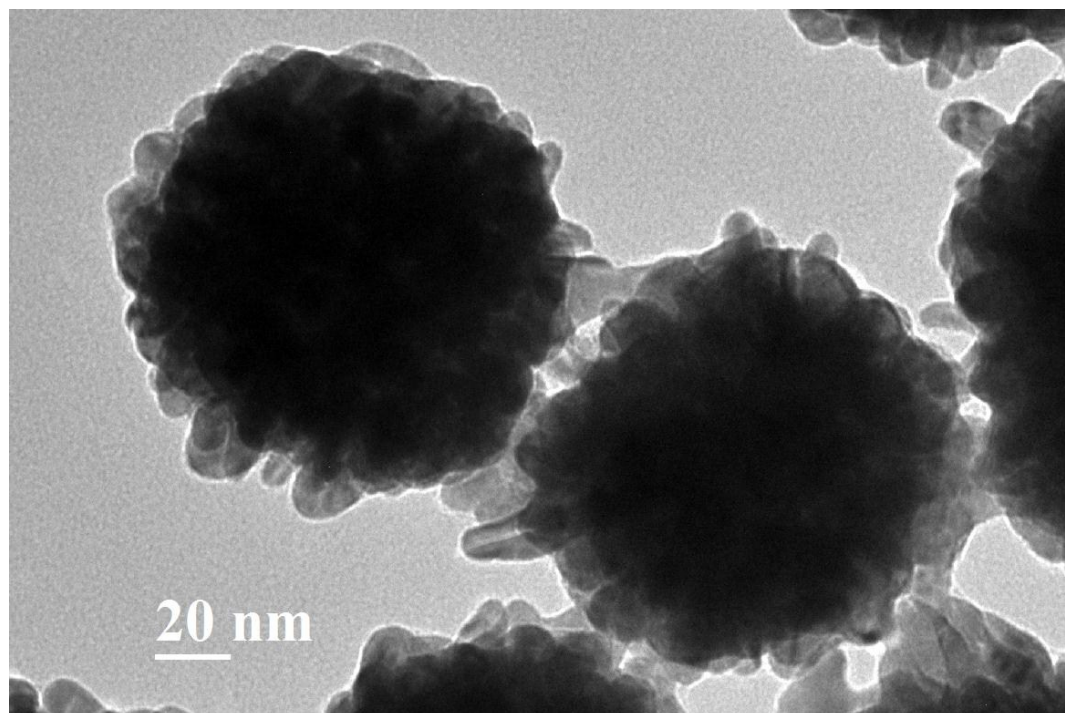

Fig. S2 HRTEM image of hollow flower-like Au crystals.

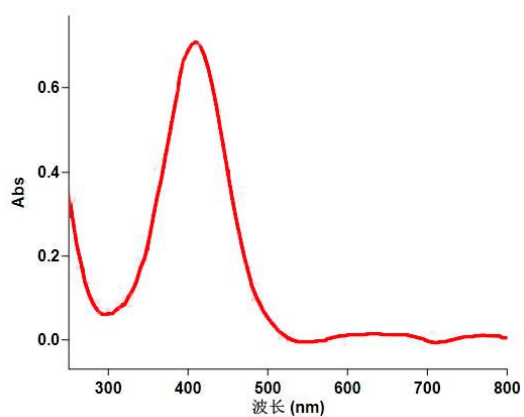

Fig. S3 Absorption spectra of 4-NTP with  $\text{NaBH}_4$ .

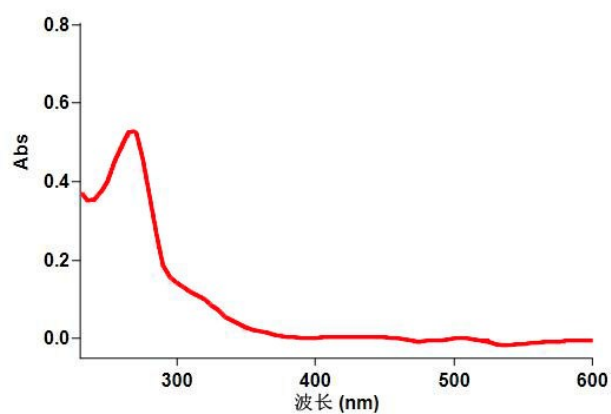

Fig. S4 Absorption spectra of 4-ATP with  $\text{NaBH}_4$ .

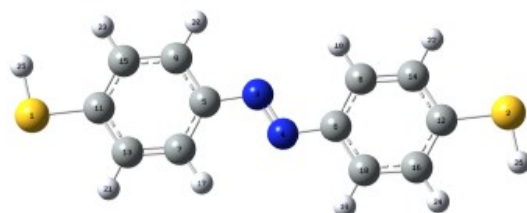

*trans*-DMAB

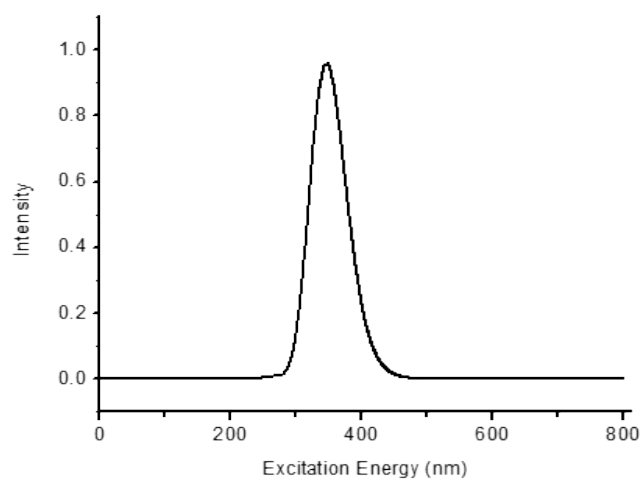

Fig. S5 The optimized structure and the calculate UV-vis spectra analysis of *trans*-DMAB.

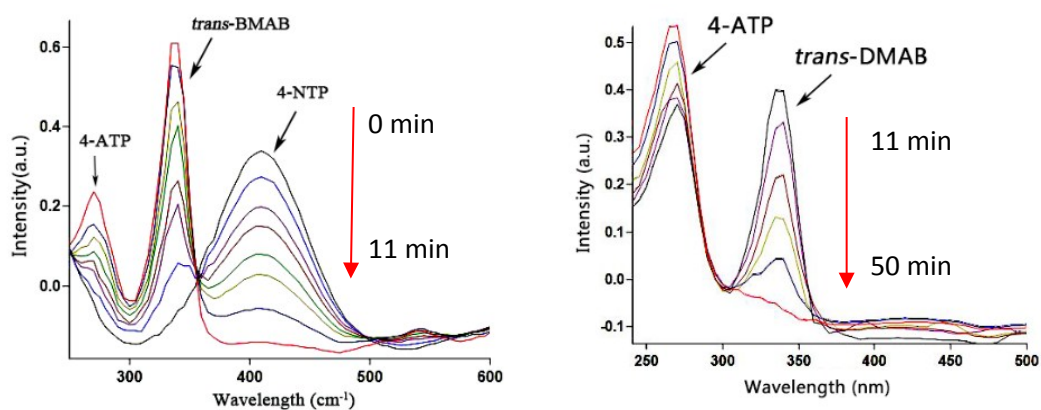

Fig. S6 Absorption spectra of 4-NTP with  $\text{NaBH}_4$  in the presence of 1.0 mg Au nanoparticles.

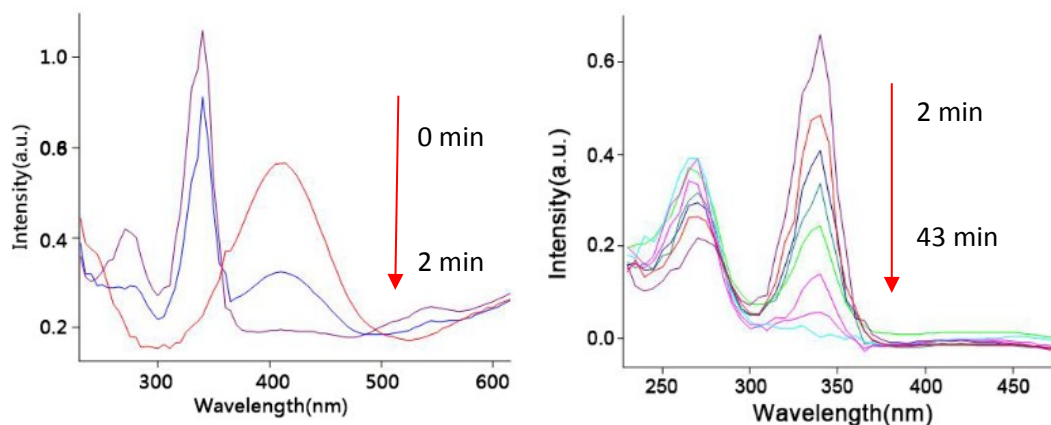

Fig. S7 Absorption spectra of 4-NTP with  $\text{NaBH}_4$  in the presence of 1.5 mg Au nanoparticles.

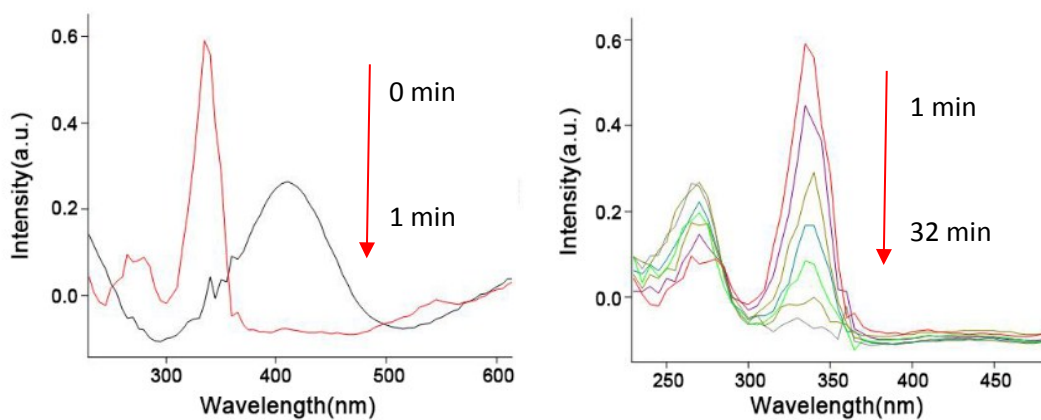

Fig. S8 Absorption spectra of 4-NTP with  $\text{NaBH}_4$  in the presence of 2.0 mg Au nanoparticles.
